# Supplementary material
Source: Elsevier journal article supplement (https://univ-rennes.hal.science/hal-01544467v1/file/mmc1.docx)
Supplement: mmc1 [file mmc1.docx]

**Table S1**. Crystal data and structure refinement for (NH4)2 (VOHPO3)2 C2O4 2.89H2O (**1**).

Empirical formula C1 H7.89 N1 O7.45 P1 V1

Formula weight 235.08

Temperature 293(2) K

Wavelength 0.71069 Å

Crystal system Triclinic

Space group P -1

Unit cell dimensions a = 6.3844(4) Å = 67.260(4)°.

b = 7.2278(4) Å = 72.927(4)°.

c = 9.2965(5) Å  = 85.848(3)°.

Volume 377.80(4) Å3

Z 2

Density (calculated) 2.075

Absorption coefficient 1.530 mm-1

F(000) 238

Crystal size 0.141 x 0.104 x 0.065 mm3

Theta range for data collection 3.541 to 30.031°.

Index ranges -8<=h<=7, -10<=k<=10, -11<=l<=13

Reflections collected 4605

Independent reflections 2122 [R(int) = 0.0503]

Completeness to theta = 25.240° 99.3 %

Absorption correction Empirical

Max. and min. transmission 0.9421 and 0.8613

Refinement method Full-matrix least-squares on F2

Data / restraints / parameters 2122 / 10 / 133

Goodness-of-fit on F2 1.082

Final R indices [I>2sigma(I)] R1 = 0.0444, wR2 = 0.1064

R indices (all data) R1 = 0.0580, wR2 = 0.1114

Largest diff. peak and hole 0.717 and -0.649 e.Å-3

**Table S2**. Selected bond lengths [Å] and angles [°] for (NH4)2 (VOHPO3)2 C2O4 2.89H2O (**1**).

_____________________________________________________

V(1)-O(1) 1.590(2)

V(1)-O(4)#1 1.992(2)

V(1)-O(7)#2 2.006(2)

V(1)-O(3) 2.015(2)

V(1)-O(5) 2.0832(18)

V(1)-O(2) 2.295(2)

P(1)-O(7) 1.519(2)

P(1)-O(3) 1.520(2)

P(1)-O(4) 1.5325(19)

P(1)-H(1) 1.32(4)

O(2)-C(1) 1.243(3)

C(1)-O(5)#3 1.269(3)

C(1)-C(1)#3 1.536(5)

O(1)-V(1)-O(4)#1 105.08(10)

O(1)-V(1)-O(7)#2 100.15(11)

O(4)#1-V(1)-O(7)#2 89.25(9)

O(1)-V(1)-O(3) 98.50(10)

O(4)#1-V(1)-O(3) 87.56(9)

O(7)#2-V(1)-O(3) 161.27(9)

O(1)-V(1)-O(5) 95.52(10)

O(4)#1-V(1)-O(5) 159.39(8)

O(7)#2-V(1)-O(5) 87.80(9)

O(3)-V(1)-O(5) 88.72(8)

O(1)-V(1)-O(2) 169.87(10)

O(4)#1-V(1)-O(2) 84.75(7)

O(7)#2-V(1)-O(2) 82.12(8)

O(3)-V(1)-O(2) 79.21(8)

O(5)-V(1)-O(2) 74.64(7)

O(7)-P(1)-O(3) 108.58(12)

O(7)-P(1)-O(4) 113.71(12)

O(3)-P(1)-O(4) 113.53(12)

O(7)-P(1)-H(1) 105.1(16)

O(3)-P(1)-H(1) 110.9(16)

O(4)-P(1)-H(1) 104.6(15)

O(2)-C(1)-O(5)#3 126.8(3)

O(2)-C(1)-C(1)#3 117.1(3)

O(5)#3-C(1)-C(1)#3 116.0(3)

_____________________________________________________________

Symmetry transformations used to generate equivalent atoms:

#1 -x,-y+1,-z+1 #2 x-1,y,z #3 -x,-y+1,-z

#4 x+1,y,z


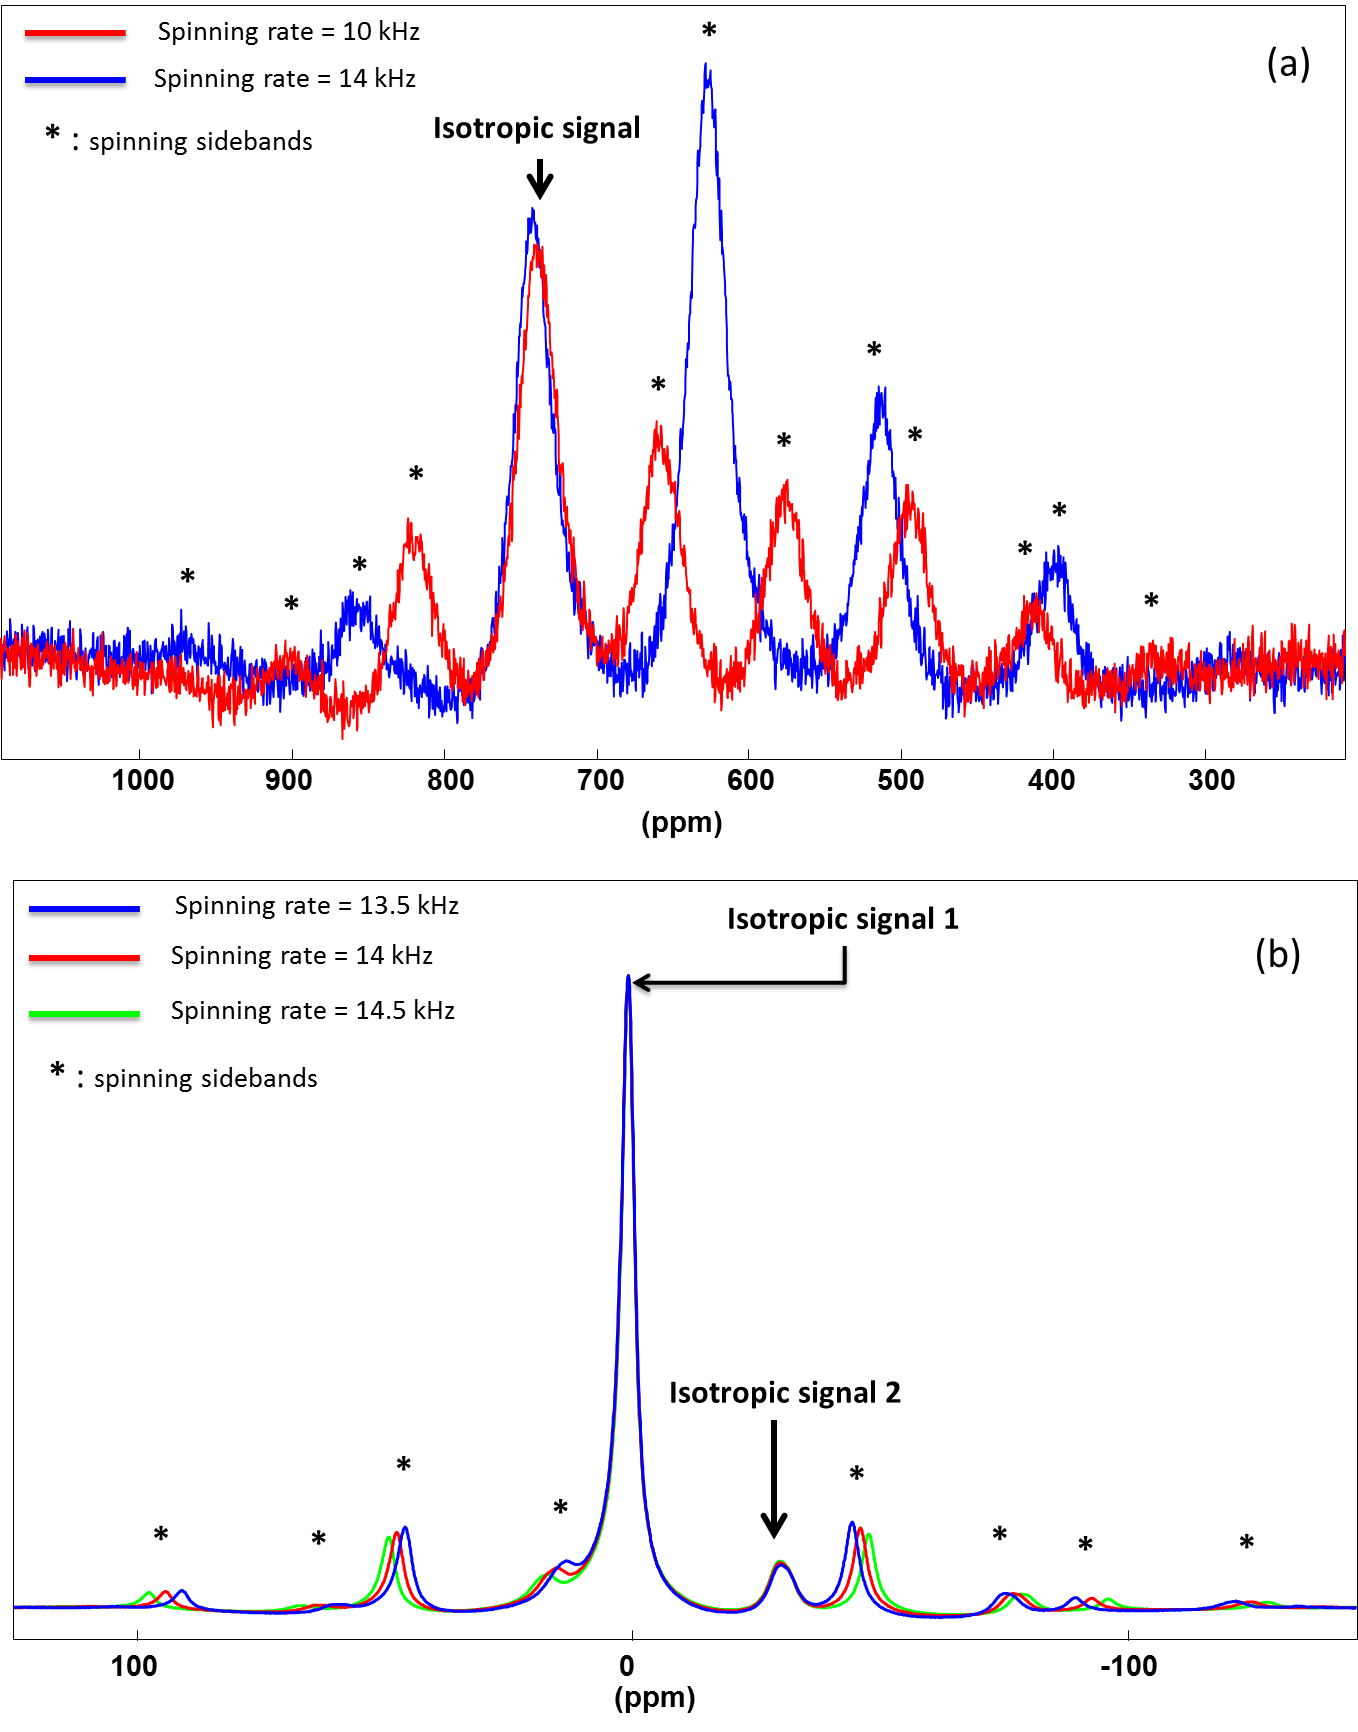


Figure S1: (a) 31P MAS NMR spectra of the oxalatophosphite at spinning rates of 10 kHz and 14 kHz in red and blue respectively: one isotropic signal is observed at 748 ppm.
(b) 1H MAS NMR spectra of the oxalatophosphite at spinning rates of 13.5 kHz, 14 kHz and 14.5 kHz in blue, red and green respectively: two isotropic signals are observed at 0.9 ppm and -29.7 ppm.

Fig S2. Magnetic measurement of (NH4)2 (VOHPO3)2 C2O4 2.9H2O


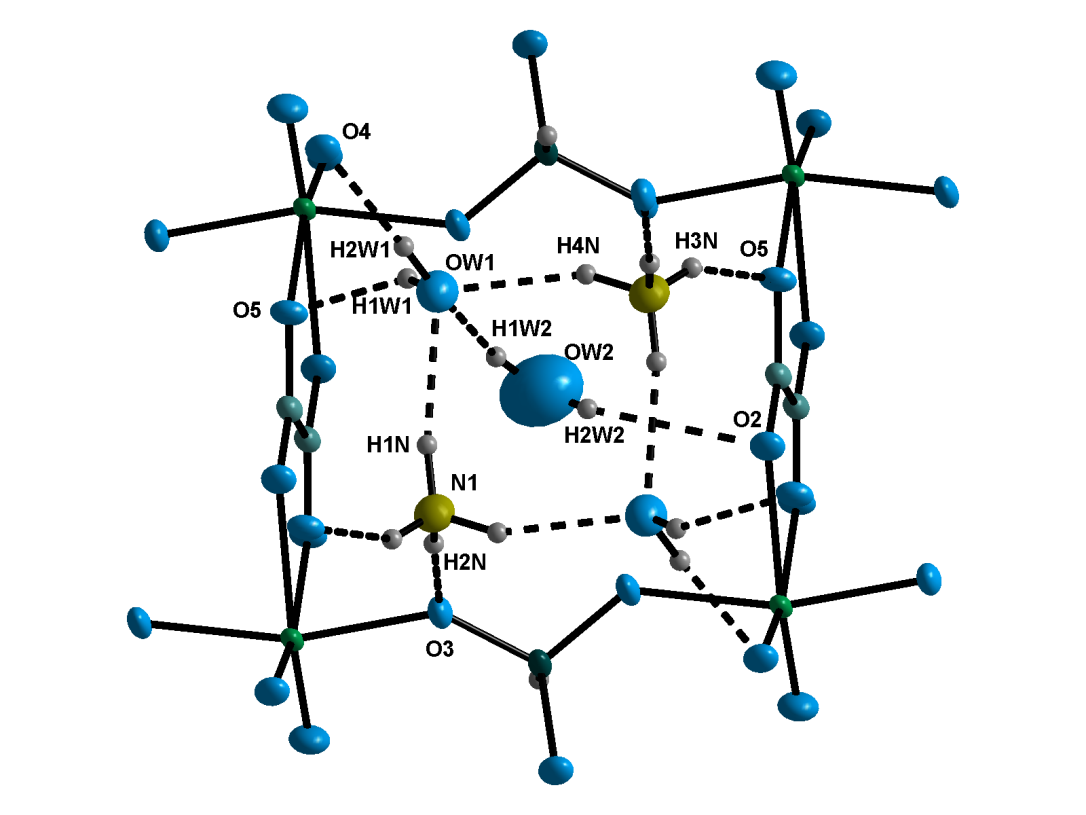


Fig. S3. The hydrogen bonding interactions from the NH4+ and H2O donor groups in **1**.


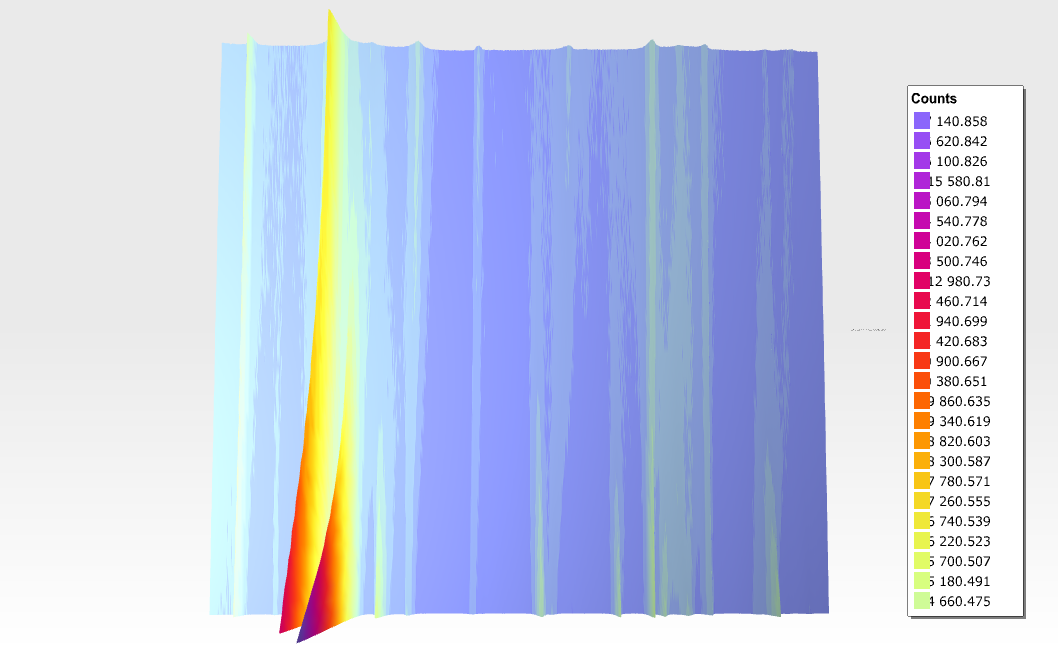


**Time (hr)**

**6**

**12**

**2**

**10**

**8**

**4**

**2 (°)**

**30**

**25**

**15**

**20**

**35**

**10**

Fig. S4. Oxidation kinetics of the phosphite compound into phosphate, observed by time-dependent X-ray diffraction at 190°C for 12 h. The peaks of the phosphite compound vanish after 4 h, while these of the expected phosphate compound are clearly seen after 8 h. The intermediate patterns correspond to the presence of the two phases.


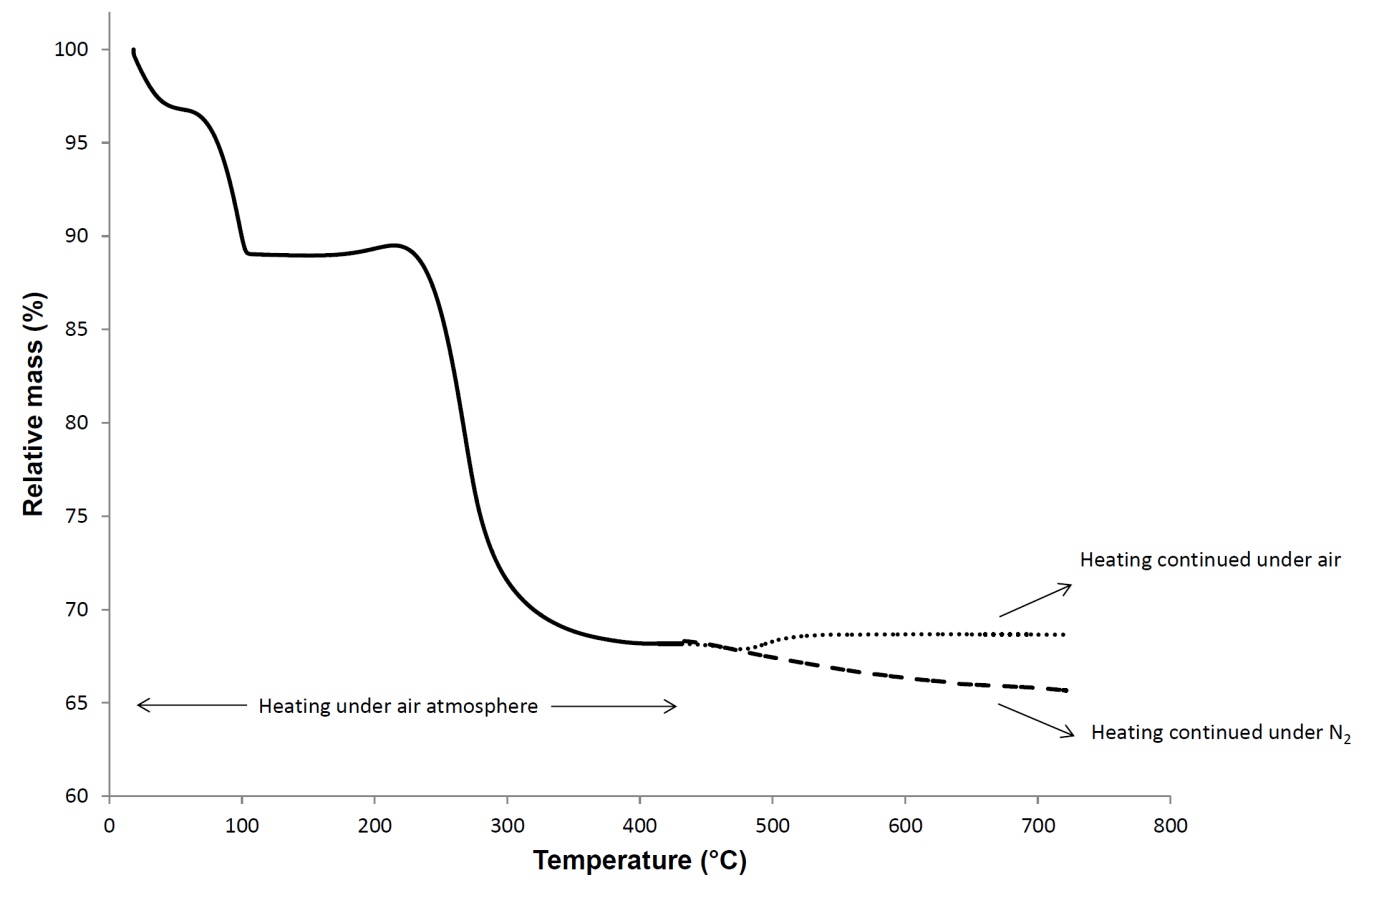


Fig. S5. Thermogravimetric curves obtained for compound **1** under flowing air up to 420°C followed by heating under air (dotted line) or under nitrogen (dashed line) up to 720°C .
